# Supplementary material
Source: PubMed Central journal article supplement (PMC9678345)
Supplement: NIHMS1667836-supplement-appendix.pdf [file NIHMS1667836-supplement-appendix.pdf]

## 1 A Further Analysis

### 2 A.1 Approximation of Expectation of Non-Linear Function

3 Suppose  $x \sim N(\mu, \Sigma)$ . We seek a local approximation to  $\mathbb{E}_x[f(x)]$ . Using a second order Taylor  
4 expansion about  $\mu$ ,

$$\mathbb{E}_x[f(x)] \approx \mathbb{E}_x \left[ f(\mu) + (x - \mu)^T \nabla f(\mu) + \frac{1}{2} (x - \mu)^T Hf(\mu) (x - \mu) \right] \quad (1)$$

5 where  $Hf(x)$  is the Hessian of  $f(x)$ . Then, as the gradient term vanishes,

$$\mathbb{E}_x[f(x)] \approx f(\mu) + \frac{1}{2} \mathbb{E}_x [(x - \mu)^T Hf(\mu) (x - \mu)] \quad (2)$$

6

$$\mathbb{E}_x[f(x)] \approx f(\mu) + \frac{1}{2} \mathbb{E}_x [x^T Hf(\mu) x - 2x^T Hf(\mu) \mu + \mu^T Hf(\mu) \mu] \quad (3)$$

7 or

$$\mathbb{E}_x[f(x)] \approx f(\mu) + \frac{1}{2} [\mathbb{E}_x [x^T Hf(\mu) x] - \mu^T Hf(\mu) \mu] . \quad (4)$$

8 Now using  $\mathbb{E}_x [x^T \Lambda x] = T_R(\Lambda \Sigma) + \mu^T \Lambda \mu$ , ( $T_R$  is the trace, see [1]),

$$\mathbb{E}_x[f(x)] \approx f(\mu) + \frac{1}{2} T_R(Hf(\mu) \Sigma) . \quad (5)$$

### 9 A.1.1 Third and Fourth Moments

10 In the following we analyze expectations of the third and fourth Taylor expansion terms, showing  
 11 that the third term vanishes, and that the fourth is proportional to  $\sigma^4 \sum_{1 \leq i, j \leq N} \partial_i^2 \partial_j^2 f(\mu)$ . We will  
 12 refer to the terms schematically as  $\text{Taylor}_\mu^3 f(x)$  and  $\text{Taylor}_\mu^4 f(x)$ . We use  $x \sim N(\mu, \Sigma = \sigma^2 I)$  as  
 13 in Sec. 2.3 of the paper. This implies that for any given  $i$ :  $x_i \sim N(\mu_i, \sigma^2)$ ;  $\mathbb{E}_{x_i} [(x_i - \mu)^3] = 0$ ;  
 14 and  $\mathbb{E}_{x_i} [(x_i - \mu)^4] = 3\sigma^4$ . For convenience, in the following derivations nonzero constants of each  
 15 term of the Taylor series have been omitted, and we denote  $\frac{\partial^n}{\partial^n x_i}$  as  $\partial_i^n$ , ommiting the superindex for  
 16  $n = 1$ .

#### 17 Third Moment

$$\mathbb{E}_x [\text{Taylor}_\mu^3 f(x)] \propto \sum_{1 \leq i \leq j \leq k \leq N} \mathbb{E}_x [\partial_i \partial_j \partial_k f(x) (x_i - \mu_i)(x_j - \mu_j)(x_k - \mu_k)] \quad (6)$$

$$\text{linearity of } \mathbb{E} = \sum_{1 \leq i \leq N} \mathbb{E}_x [\partial_i^3 f(\mu) (x_i - \mu_i)^3] \quad (7)$$

$$+ \sum_{1 \leq i \neq j \leq N} \mathbb{E}_x [\partial_i^2 \partial_j f(\mu) (x_i - \mu_i)^2 (x_j - \mu_j)] \quad (8)$$

$$+ \sum_{1 \leq i \neq j \neq k \leq N} \mathbb{E}_x [\partial_i \partial_j \partial_k f(\mu) (x_i - \mu_i)(x_j - \mu_j)(x_k - \mu_k)] \quad (9)$$

$$\text{linearity of } \mathbb{E} = \sum_{1 \leq i \leq N} \partial_i^3 f(\mu) \mathbb{E}_x [(x_i - \mu_i)^3] \quad (10)$$

$$+ \sum_{1 \leq i \neq j \leq N} \partial_i^2 \partial_j f(\mu) \mathbb{E}_x [(x_i - \mu_i)^2 (x_j - \mu_j)] \quad (11)$$

$$+ \sum_{1 \leq i \neq j \neq k \leq N} \partial_i \partial_j \partial_k f(\mu) \mathbb{E}_x [(x_i - \mu_i)(x_j - \mu_j)(x_k - \mu_k)] \quad (12)$$

$$\text{independence } (\Sigma \text{ is } \sigma^2 I) = \sum_{1 \leq i \leq N} \partial_i^3 f(\mu) \mathbb{E}_{x_i} [(x_i - \mu_i)^3] \quad (13)$$

$$+ \sum_{1 \leq i \neq j \leq N} \partial_i^2 \partial_j f(\mu) \mathbb{E}_{x_i} [(x_i - \mu_i)^2] \mathbb{E}_{x_j} [x_j - \mu_j] \quad (14)$$

$$+ \sum_{1 \leq i \neq j \neq k \leq N} \partial_i \partial_j \partial_k f(\mu) \cdot \mathbb{E}_{x_i} [x_i - \mu_i] \mathbb{E}_{x_j} [x_j - \mu_j] \mathbb{E}_{x_k} [x_k - \mu_k] \quad (15)$$

$$\text{Due to } x \sim N(\mu, \sigma^2 I) = \sum_{1 \leq i \leq N} \partial_i^3 f(\mu) \cdot 0 \quad (\text{no skew}) \quad (16)$$

$$+ \sum_{1 \leq i \neq j \leq N} \partial_i^2 \partial_j f(\mu) \mathbb{E}_{x_i} [(x_i - \mu_i)^2] 0 \quad (\mu \text{ mean}) \quad (17)$$

$$+ \sum_{1 \leq i \neq j \neq k \leq N} \partial_i \partial_j \partial_k f(\mu) \cdot 0 \cdot 0 \cdot 0 \quad (\mu \text{ mean}) \quad (18)$$

$$= 0 \quad (19)$$

18 **Fourth Moment** We now derive the fourth moment without most of the tedious algebra we used to  
 19 derive the third, but following the same ideas.

$$\mathbb{E}_x [\text{Taylor}_\mu^4 f(x)] \propto \sum_{1 \leq i \leq j \leq k \leq l \leq N} \mathbb{E}_x [\partial_i \partial_j \partial_k \partial_l f(x) (x_i - \mu_i)(x_j - \mu_j)(x_k - \mu_k)(x_l - \mu_l)] \quad (20)$$

$$= \sum_{1 \leq i \leq N} \partial_i^4 f(\mu) \mathbb{E}_x [(x_i - \mu_i)^4] \quad (21)$$

$$+ \sum_{1 \leq i \neq j \leq N} \partial_i^2 \partial_j^2 f(\mu) \mathbb{E}_{x_i} [(x_i - \mu_i)^2] \mathbb{E}_{x_j} [(x_j - \mu_j)^2] \quad (22)$$

$$+ \sum_{1 \leq i \neq j \leq N} \partial_i^3 \partial_j f(\mu) \mathbb{E}_{x_i} [(x_i - \mu_i)^3] \mathbb{E}_{x_j} [(x_j - \mu_j)] \quad (23)$$

$$+ \sum_{1 \leq i \neq j \neq k \leq N} \partial_i^2 \partial_j \partial_k f(\mu) \quad (24)$$

$$\cdot \mathbb{E}_{x_i} [(x_i - \mu_i)^2] \mathbb{E}_{x_j} [x_j - \mu_j] \mathbb{E}_{x_k} [x_k - \mu_k] \\ + \sum_{1 \leq i \neq j \neq k \neq l \leq N} \partial_i \partial_j \partial_k \partial_l f(\mu) \quad (25)$$

$$\cdot \mathbb{E}_{x_i} [x_i - \mu_i] \mathbb{E}_{x_j} [x_j - \mu_j] \mathbb{E}_{x_k} [x_k - \mu_k] \mathbb{E}_{x_l} [x_l - \mu_l] \\ = \sum_{1 \leq i \leq N} \partial_i^4 f(\mu) \mathbb{E}_x [(x_i - \mu_i)^4] \quad (26)$$

$$+ \sum_{1 \leq i \neq j \leq N} \partial_i^2 \partial_j^2 f(\mu) \mathbb{E}_{x_i} [(x_i - \mu_i)^2] \mathbb{E}_{x_j} [(x_j - \mu_j)^2] \quad (27)$$

$$= \sigma^4 \left( 3 \sum_{1 \leq i \leq N} \partial_i^4 f(\mu) + \sum_{1 \leq i \neq j \leq N} \partial_i^2 \partial_j^2 f(\mu) \right) \quad (28)$$

$$\propto \sigma^4 \sum_{1 \leq i, j \leq N} \partial_i^2 \partial_j^2 f(\mu) \quad (29)$$

## 20 A.2 Laplacian of Log Likelihood

21 We derive here the Laplacian of the log likelihood of the base network.

$$\Delta \mathcal{L}(\theta) = \sum_k \frac{\partial^2}{\partial \theta_k^2} \sum_i \ln L_i(\theta) = \sum_k \sum_i \frac{\partial^2}{\partial \theta_k^2} \ln L_i(\theta) . \quad (30)$$

22 Differentiating,

$$\Delta \mathcal{L}(\theta) = \sum_k \sum_i \frac{\partial}{\partial \theta_k} \frac{\frac{\partial}{\partial \theta_k} L_i(\theta)}{L_i(\theta)} , \quad (31)$$

23 then

$$\Delta \mathcal{L}(\theta) = \sum_k \sum_i \left[ \frac{\frac{\partial^2}{\partial \theta_k^2} L_i(\theta)}{L_i(\theta)} - \frac{(\frac{\partial}{\partial \theta_k} L_i(\theta))^2}{L_i^2(\theta)} \right] , \quad (32)$$

24 or,

$$\Delta \mathcal{L}(\theta) = \sum_i \left[ \frac{\Delta L_i(\theta)}{L_i(\theta)} - \frac{\nabla L_i(\theta)^2}{L_i^2(\theta)} \right] , \quad (33)$$

25 where  $\nabla L_i(\theta)^2 = \nabla L_i(\theta) \cdot \nabla L_i(\theta)$ . Then

$$\Delta \mathcal{L}(\theta) = \sum_i \left[ \frac{\Delta L_i(\theta)}{L_i(\theta)} - (\nabla \ln L_i(\theta))^2 \right] . \quad (34)$$

## 26 B Evaluation metrics

27 For a K-class classification problem, with N samples, NLL and Brier score are calculated as  
 28  $-N^{-1} \sum_{n=1}^N \sum_{k=1}^K y_{i,k} \cdot \ln(p_{i,k})$  and  $-K^{-1}N^{-1} \sum_{n=1}^N \sum_{k=1}^K (y_{i,k} - p_{i,k})^2$ , respectively. Where  
 29  $y_{i,k}$  is the true one-hot encoded label which is 1 if sample  $i$  has label  $k \in K$ , and otherwise is 0.  
 30  $p_{i,k}$  is the predicted class probability of sample  $i$  belonging to class  $k \in K$ . Reliability diagrams  
 31 plot expected accuracy as a function of class probability (confidence). Expected Calibration Er-  
 32 ror (ECE) is used to summarize the results of reliability diagrams. Details of evaluation metrics  
 33 are given in the Supplementary Material. For expected accuracy measurement, the samples are  
 34 binned into N groups and the accuracy and confidence for each group are computed. Assuming  
 35  $D_m$  to be indices of samples whose confidence predictions are in the range of  $(\frac{m-1}{M}, \frac{m}{M}]$ , the  
 36 expected accuracy of the  $D_m$  is  $Acc(D_m) = |D_m|^{-1} \sum_{i \in D_m} y_{i,k}$ . The average confidence on  
 37 bin  $D_m$  is calculated as  $\bar{P}(D_m) = |D_m|^{-1} \sum_{i \in D_m} p_{i,k}$ . ECE is calculated by summing up the  
 38 weighted average of the differences between accuracy and the average confidence over the bins:  
 39  $ECE = \sum_{m=1}^M N^{-1} |D_m| |ACC(D_m) - \bar{P}(D_m)|$ .

## 40 C Additional Results on ImageNet

41 Figure 1 shows reliability diagrams together with ECE values for baseline, temperature scaling and  
 42 parameter ensembling with perturbation (PEP) for the pre-trained ImageNet networks.

## 43 References

- 44 [1] Arakaparampil M Mathai and Serge B Provost. *Quadratic forms in random variables: theory*  
 45 *and applications*. Dekker, 1992.

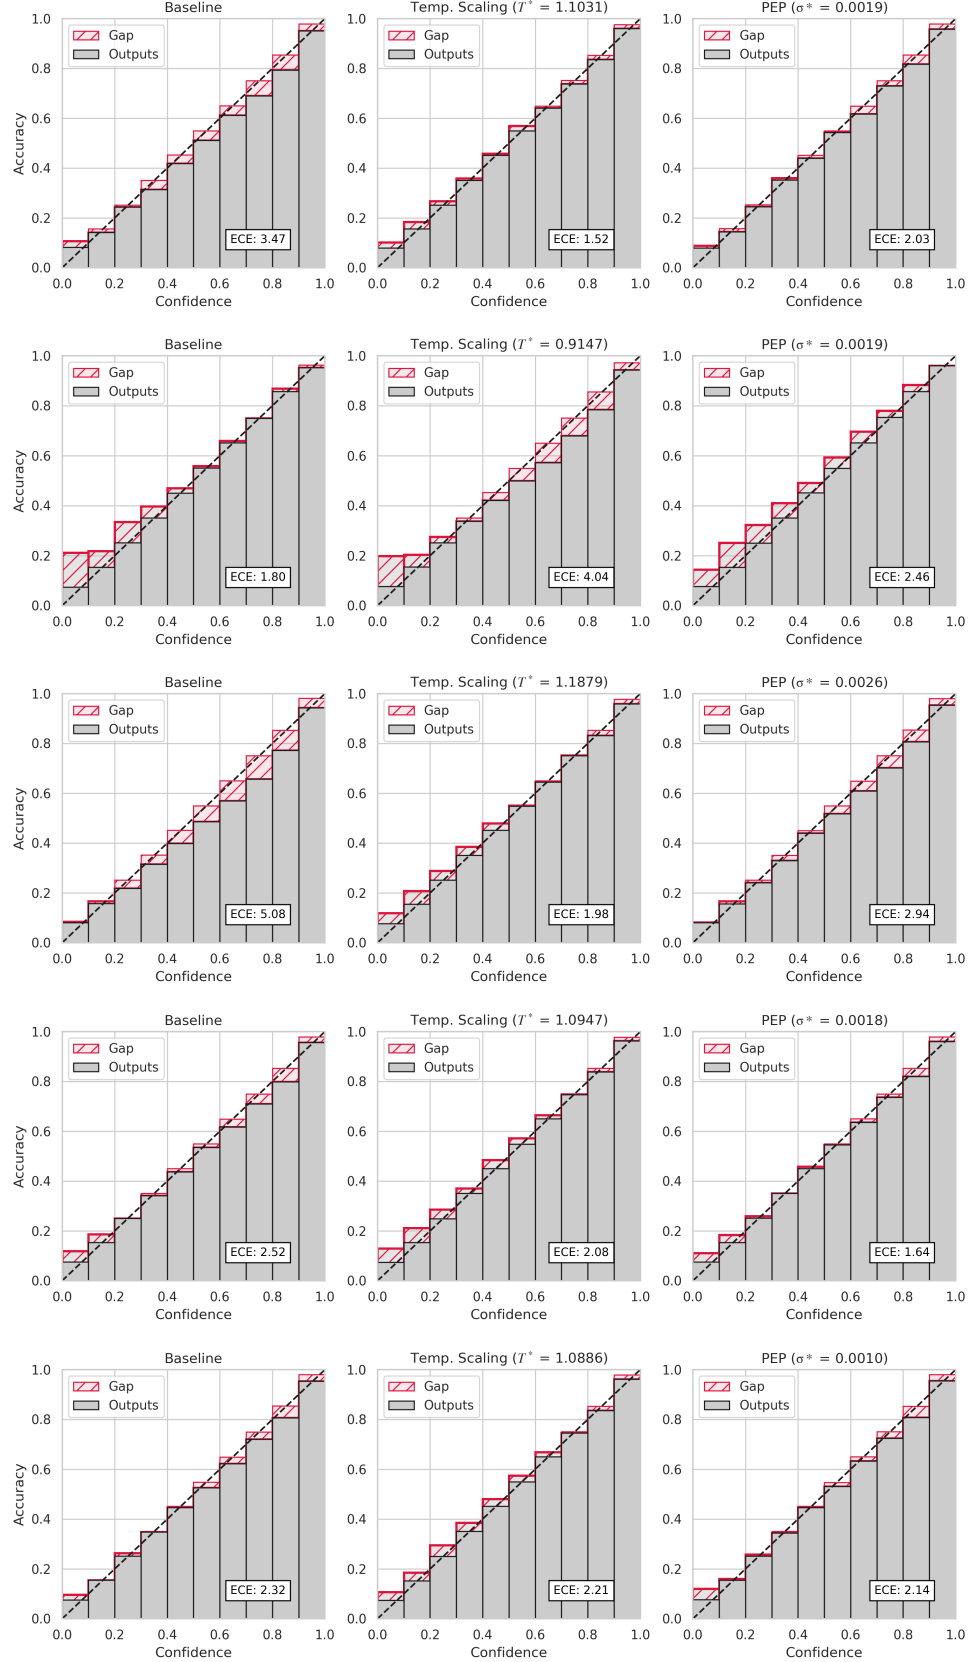

Figure 1: Reliability diagrams and ECE values before and after calibration with Temperature Scaling and PEP, for experiments described in Section 3.1 of the manuscript. From top to bottom: DenseNet121, InceptionV3, ResNet50, VGG16, and VGG19.
